# Supplementary material
Source: Springer Nature journal article supplement (https://www.springermedizin.de/resource/supplementary/12889_2009_2258_MOESM1_ESM.pdf/9485168)
Supplement: MOESM1 [file 9485168]

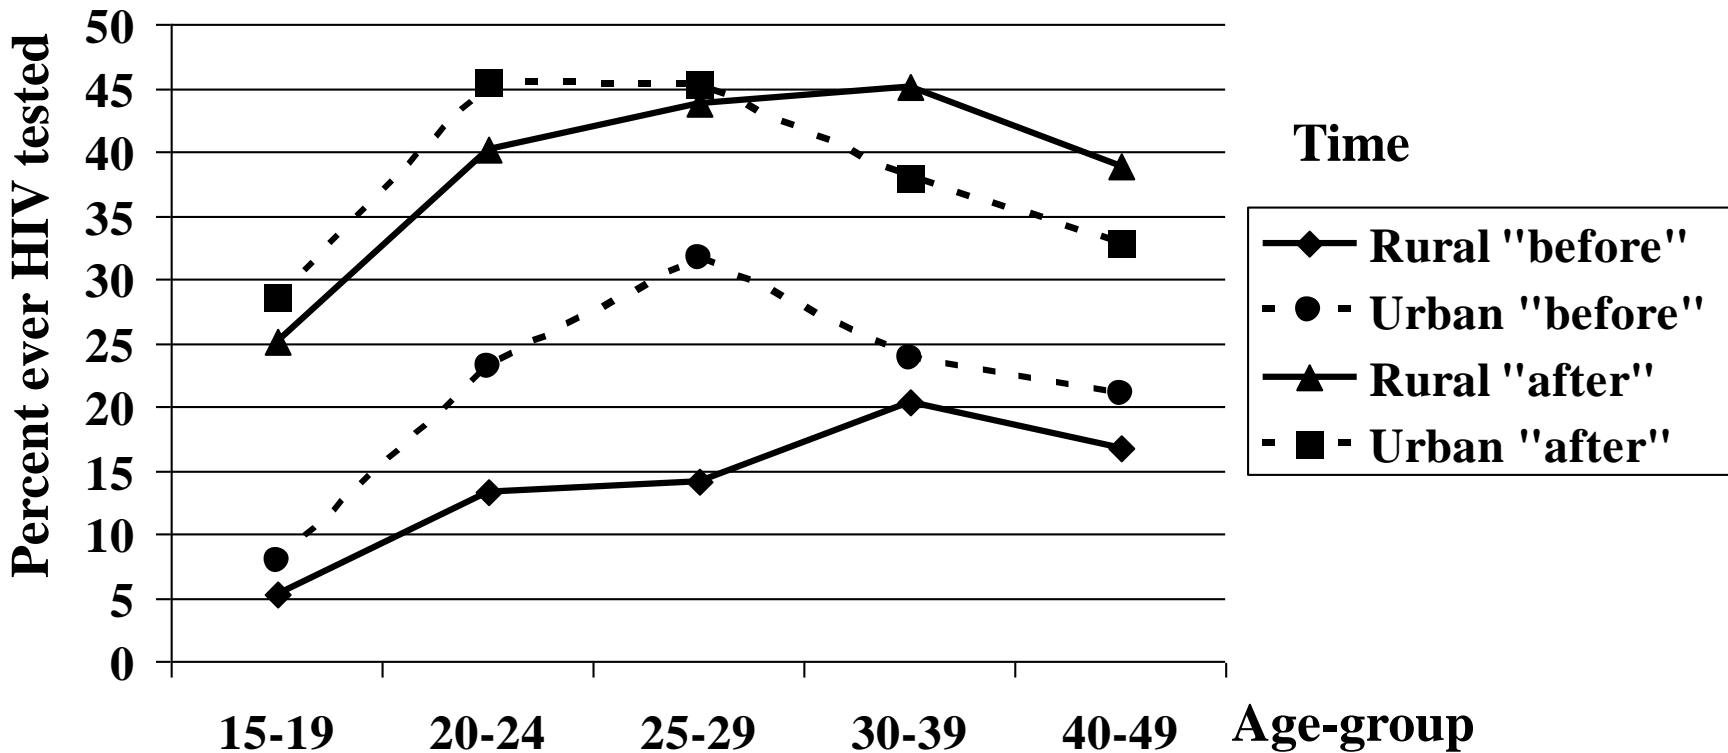

“Before”: % ever tested before offering home-based VCT;  
 “After”: % ever tested after offering home-based VCT
